# Supplementary material
Source: Springer Nature journal article supplement (https://www.springermedizin.de/resource/supplementary/12985_2009_771_MOESM4_ESM.pdf/9608926)

A

B

1

2

3

4

5

1

2

3

4

6

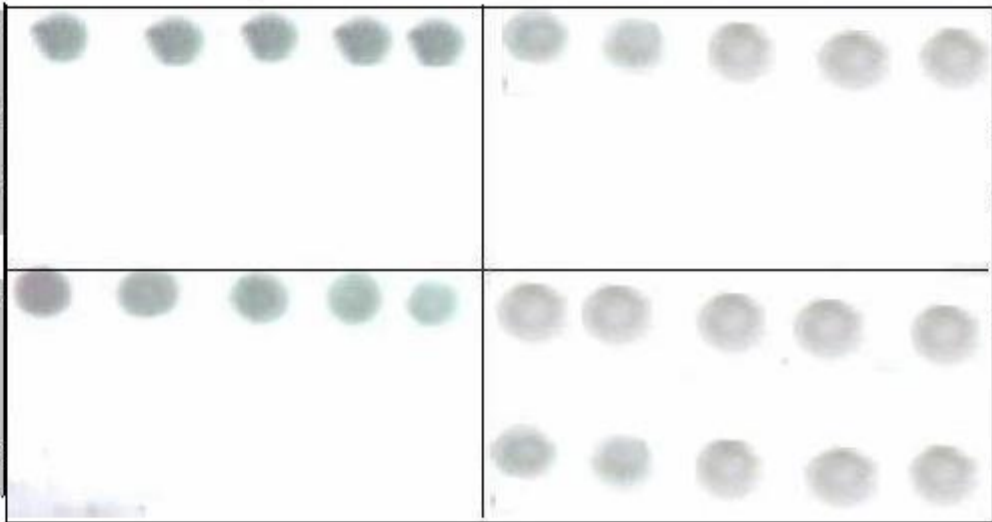

Supplement: MOESM4 [file 9608926]
